# Supplementary material
Source: PubMed Central journal article supplement (PMC3283124)

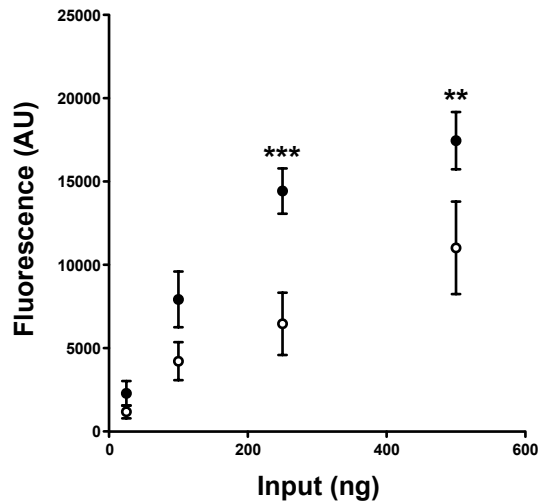

Supplement: supp_dev.072439_DEV072439FigS4.pdf [file supp_dev.072439_DEV072439FigS4.pdf]

*sdp*<sup>w12/+</sup>

*sdp*<sup>w12/w12</sup>

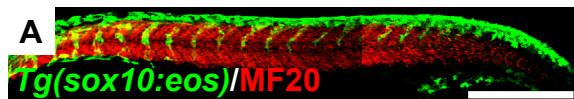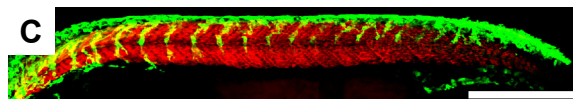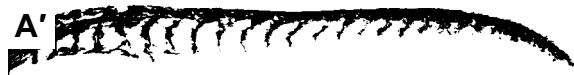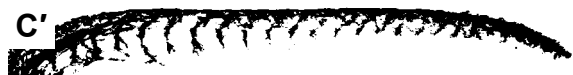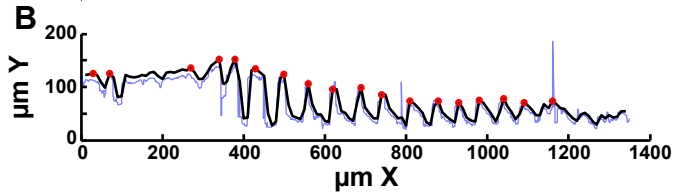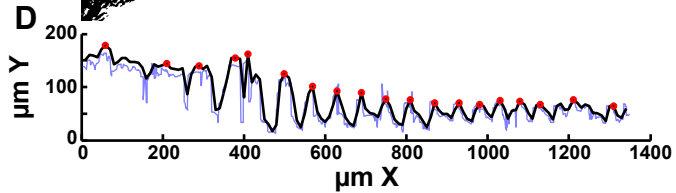

**E**

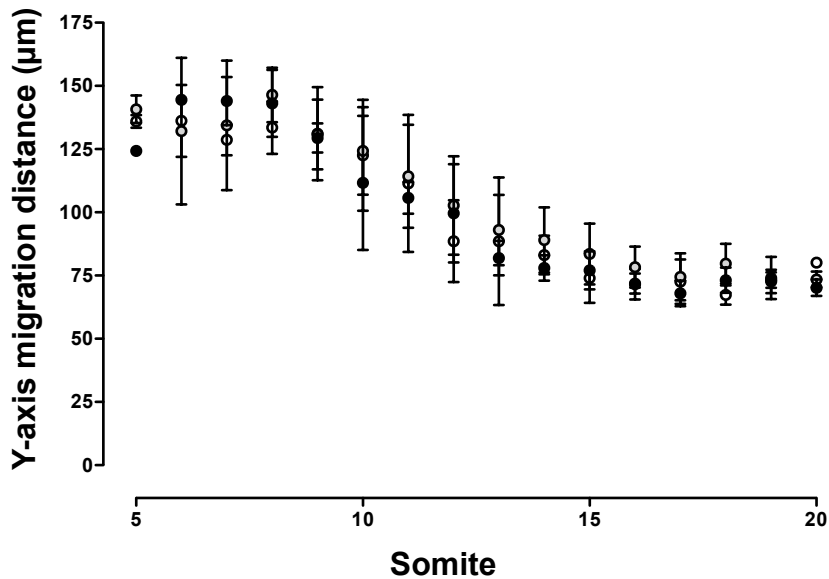

Supplement: supp_dev.072439_DEV072439FigS6.pdf [file supp_dev.072439_DEV072439FigS6.pdf]
